# Supplementary material for: Imatges i missatges a la cançó infantil
Source: MDPI journal article supplement (doi:10.3390/toxins15050317), 2008-01-01
Supplement: s1 [file s1]

# Practical Application of a Urinary Zearalenone Monitoring System for Feed Hygiene Management of a Japanese Black Cattle Breeding Herd—Relevance to Anti-Müllerian Hormone and Serum Amyloid A Clarified from a Two-Year Survey

Okuy Setyo Widodo, Dhidhi Pambudi, Makoto Etoh, Emiko Kokushi, Seichi Uno, Osamu Yamato, Masayasu Taniguchi, Mirni Lamid and Mitsuhiro Takagi

**Table S1.** The raw data of ZEN, AMH, and SAA measurement results.

| Date            | Cow numbers (ear tag number) |      |      |          |      |      |          |      |     |          |      |      |          |      |      |          |     |     |
|-----------------|------------------------------|------|------|----------|------|------|----------|------|-----|----------|------|------|----------|------|------|----------|-----|-----|
|                 | 1 (0842)                     |      |      | 2 (2291) |      |      | 3 (2646) |      |     | 4 (2899) |      |      | 5 (4622) |      |      | 6 (6074) |     |     |
|                 | ZEN                          | AMH  | SAA  | ZEN      | AMH  | SAA  | ZEN      | AMH  | SAA | ZEN      | AMH  | SAA  | ZEN      | AMH  | SAA  | ZEN      | AMH | SAA |
| July, 2020      | 2257.7                       | 1230 | 5.1  | 1382.5   | 1357 | 3.3  | 4366     | 1290 | 1.8 | 2445.4   | 1241 | 2.1  | 1353.7   | 2490 | 2.5  |          |     |     |
| August, 2020    | 9021.1                       | 1247 | 2.9  | 5802.3   | 674  | 23.4 | 9662.3   | 1441 | 2.1 |          |      |      | 5222.3   | 2099 | 2.2  |          |     |     |
| September, 2020 | 335.5                        | 1506 | 2.2  | 324.9    | 870  | 3.6  | 668.1    | 1445 | 1.9 | 915.8    | 937  | 5.7  | 576.1    | 2032 | 2.3  |          |     |     |
| October, 2020   | 1585.1                       | 1219 | 2.1  | 800.8    | 1093 | 18.1 | 946.2    | 1294 | 2.3 | 925.4    | 1252 | 4.5  | 1236.3   | 1925 | 2.5  |          |     |     |
| November, 2020  | 586.5                        | 954  | 3.1  | 618.2    | 1853 | 3.1  | 609.8    | 1331 | 5   | 803.4    | 1481 | 2.5  | 471.4    | 1465 | 3.2  |          |     |     |
| December, 2020  | 1146.9                       | 1338 | 4.7  | 467.2    | 2429 | 3.5  | 590.5    | 1548 | 2.7 | 1616.4   | 1696 | 2.3  | 380.3    | 1318 | 2.6  |          |     |     |
| January, 2021   | 699.4                        | 1759 | 6.1  | 520.3    | 2639 | 26.8 | 884.2    | 1513 | 2.5 | 936.5    | 1890 | 2.4  | 471.5    | 1303 | 2.9  |          |     |     |
| February, 2021  | 1284.8                       | 1979 | 5.5  | 886.8    | 1985 | 3.3  | 730.9    | 1563 | 2.2 | 1678.9   | 1918 | 2.3  | 631.3    | 744  | 2.9  |          |     |     |
| March, 2021     | 712.8                        | 1864 | 5.5  | 618.2    | 1950 | 19.7 | 924.6    | 1073 | 4.9 | 769.0    | 2140 | 2.7  | 520.0    | 1351 | 3.1  |          |     |     |
| April, 2021     | 3866.8                       | 1808 | 3.4  | 1604.4   | 1377 | 3.8  | 3784.0   | 1185 | 4.7 | 9710.6   | 2099 | 2.3  | 1460.1   | 1300 | 2.8  |          |     |     |
| May, 2021       | 1178.7                       | 1931 | 2.8  | 1899.8   | 1221 | 2.7  | 2500.3   | 1399 | 1.1 | 3589.3   | 1910 | 1.9  | 849.1    | 2061 | 14.5 |          |     |     |
| June, 2021      | 1814.0                       | 1552 | 3.0  | 763.6    | 964  | 7.4  | 2012.2   | 1564 | 1.6 | 1785.8   | 1600 | 1.8  | 782.4    | 1505 | 2.0  |          |     |     |
| July, 2021      | 1534.5                       | 1827 | 1.7  | 2397.7   | 886  | 3.1  | 2945.7   | 2174 | 1.2 | 3237.6   | 1466 | 2.1  | 1650.8   | 1902 | 1.3  |          |     |     |
| August, 2021    | 1370.8                       | 1635 | 1.2  | 1434.8   | 933  | 17.4 | 2901.0   | 2015 | 8.1 | 2738.7   | 1097 | 4.1  | 1207.2   | 1599 | 1.0  |          |     |     |
| September, 2021 | 557.1                        | 663  | 20.3 | 831.0    | 938  | 2.7  | 2778.2   | 1727 | 1.5 | 4948.0   | 1105 | 13.3 | 2752.4   | 984  | 7.5  |          |     |     |
| October, 2021   | 313.9                        | 921  | 3.2  | 641.3    | 1970 | 5    | 732.4    | 1911 | 1.7 | 860.8    | 1253 | 35.1 | 565.9    | 1271 | 1.7  |          |     |     |
| November, 2021  | 910.4                        | 1134 | 5.7  | 576.4    | 2262 | 3.1  | 502.9    | 1232 | 2.3 | 957.8    | 734  | 6.7  | 425.0    | 511  | 1.7  |          |     |     |
| December, 2021  | 518.8                        | 1211 | 4.5  | 830.9    | 2140 | 0.5  | 722.9    | 1456 | 0.8 | 1132.9   | 1499 | 17   | 604.8    | 777  | 2.9  |          |     |     |

|                |        |      |     |       |      |      |        |      |     |        |      |     |       |      |      |       |     |     |
|----------------|--------|------|-----|-------|------|------|--------|------|-----|--------|------|-----|-------|------|------|-------|-----|-----|
| January, 2022  | 711.2  | 1767 | 0.2 | 361.9 | 2157 | 0.1  | 491.4  | 1248 | 0   | 545.9  | 1685 | 0   | 558.7 | 713  | 4.6  |       |     |     |
| February, 2022 | 2410.4 | 1731 | 6.9 |       | 1504 |      | 1224.6 | 969  | 3.5 | 1334.9 | 1443 | 2.1 | 661.4 | 816  | 3.3  | 709.2 | 285 | 4.5 |
| March, 2022    | 697.1  | 1851 | 0.6 | 889.5 | 1725 | 0.6  | 848.6  | 709  | 7   |        |      |     | 266.8 | 1332 | 0.4  | 509.6 | 280 | 0.5 |
| April, 2022    | 627.2  | 2059 | 3.9 | 746.4 | 1451 | 5.2  | 1312.8 | 923  | 6.3 |        |      |     | 566.9 | 1423 | 2.8  | 245.1 | 407 | 8.2 |
| May, 2022      | 514.7  | 1622 | 2.3 | 904.0 | 1082 | 1.1  | 815.3  | 1003 | 4.3 |        |      |     | 383.7 | 1964 | 0.5  | 684.4 | 635 | 1.0 |
| June, 2022     | 995.8  | 1374 | 1.0 | 453.5 | 982  | 2.2  | 1166.2 | 1625 | 0.7 |        |      |     | 409.8 | 1766 | 10.9 | 610.2 | 528 | 1.3 |
| July, 2022     | 333.3  | 1680 | 0.9 |       | 569  | 23.0 | 461.0  | 2075 | 0.9 |        |      |     | 438.4 | 2196 | 1.3  | 415.9 | 671 | 1.6 |

ZEN (pg/mg Cre); AMH (pg/mL); SAA (mg/L).

Cow 6 is a replacement cow from the same herd after Cow 4 was culled; Sampling could not be performed for Cow 4 in August 2020 because she was about to calve at the time of sampling; ZEN and SAA Cow 2 were not obtained in February 2022, nor was ZEN in July 2022.
